# Supplementary material
Source: publisher figshare collection journal article supplement (https://tandf.figshare.com/articles/dataset/_/4742116)
Supplement: Supplementary file 1 [file 2]

| Gene              | Transcript start | Transcript end | Circle start | Circle end | Circle size | # reads in A <sup>[1]</sup> | # reads in B <sup>[2]</sup> | # reads in C <sup>[3]</sup> | enrich. <sup>[4]</sup> |
|-------------------|------------------|----------------|--------------|------------|-------------|-----------------------------|-----------------------------|-----------------------------|------------------------|
| sR46              | 57320 (asRNA)    | 57597          | 57374        | 57441      | 67          | 867                         | 292                         | 899                         | 1.05                   |
| PABsnRNA44 (sR45) | 63444 (ea)       | 65712          | 64244        | 64306      | 62          | 15                          | 8                           | 28                          | 7.08                   |
| PABsnRNA21 (sR14) | 65157 (asRNA)    | 65282          | 65218        | 65278      | 60          | 49                          | 16                          | 107                         | 2.87                   |
| sR22              | 63444 (ea)       | 65712          | 65333        | 65397      | 64          | 206                         | 17                          | 255                         | 2.41                   |
| sR32              | 67489 (ea)       | 68026          | 67951        | 68012      | 61          | 143                         | 25                          | 140                         | 1.97                   |
| PABsnRNA3 (sR21)  | 126284 (ea)      | 127802         | 127067       | 127128     | 61          | 9                           | 0                           | 3                           | 15.73                  |
| PABsnRNA10 (sR2)  | 230598 (asRNA)   | 230710         | 230632       | 230696     | 64          | 11                          | 2                           | 12                          | 1.94                   |
| sR49              | 235431 (sRNA)    | 235516         | 235439       | 235502     | 63          | 35                          | 5                           | 61                          | 1.29                   |
| PABsnRNA33 (sR13) | 245269 (ea)      | 246692         | 245974       | 246035     | 61          | 7                           | 2                           | 8                           | 3.86                   |
| sR31              | 257459 (ea)      | 258141         | 258066       | 258127     | 61          | 55                          | 19                          | 100                         | 2.16                   |
| PABsnRNA35 (sR29) | 318111 (utr5)    | 318226         | 318118       | 318182     | 64          | 64                          | 3                           | 35                          | 2.81                   |
| PABsnRNA32 (sR4)  | 473162 (utr5)    | 473254         | 473175       | 473236     | 61          | 1                           | 0                           | 3                           | 52.2                   |
| PABsnRNA38 (sR58) | 539780 (ea)      | 541847         | 541770       | 541831     | 61          | 80                          | 14                          | 111                         | 2.15                   |
| PABsnRNA40 (sR39) | 543825 (sRNA)    | 543920         | 543855       | 543917     | 62          | 10                          | 0                           | 2                           | 4.6                    |
| PABsnRNA31 (sR20) | 553132 (ea)      | 554479         | 553656       | 553721     | 65          | 11                          | 1                           | 14                          | 2.67                   |
| PABsnRNA12 (sR26) | 631448 (sRNA)    | 631675         | 631518       | 631581     | 63          | 73                          | 7                           | 181                         | 5.74                   |
| PABsnRNA39 (sR60) | 631448 (sRNA)    | 631675         | 631584       | 631644     | 60          | 218                         | 21                          | 436                         | 7.49                   |
| PABsnRNA13 (sR44) | 636650 (sRNA)    | 636775         | 636702       | 636762     | 60          | 31                          | 5                           | 36                          | 13.58                  |
| PABsnRNA17 (sR7)  | 647252 (ea)      | 648632         | 648165       | 648228     | 63          | 4                           | 2                           | 8                           | 43.0                   |
| sR25              | 675393 (asRNA)   | 675502         | 675408       | 675468     | 60          | 4                           | 1                           | 5                           | 62.5                   |
| PABsnRNA36 (sR55) | 910377 (utr5)    | 910573         | 910497       | 910569     | 72          | 26                          | 7                           | 27                          | 4.91                   |
| PABsnRNA27 (sR35) | 949138 (ea)      | 951058         | 949199       | 949261     | 62          | 10                          | 2                           | 24                          | 2.83                   |
| sR56              | 960247 (sRNA)    | 960405         | 960309       | 960370     | 61          | 30                          | 15                          | 108                         | 5.31                   |
| PABsnRNA25 (sR3)  | 991432 (sRNA)    | 991508         | 991446       | 991505     | 59          | 13                          | 1                           | 24                          | 13.74                  |
| PABsnRNA1 (sR24)  | 1024201 (ea)     | 1028004        | 1026074      | 1026133    | 59          | 8                           | 10                          | 22                          | 6.93                   |
| sR53              | 1042208 (utr5)   | 1042365        | 1042251      | 1042319    | 68          | 2508                        | 720                         | 6159                        | 1.11                   |
| PABsnRNA46 (sR38) | 1065022 (ea)     | 1067559        | 1065728      | 1065791    | 63          | 14                          | 2                           | 9                           | 5.14                   |
| PABsnRNA28 (sR37) | 1195774 (sRNA)   | 1195856        | 1195780      | 1195842    | 62          | 20                          | 1                           | 19                          | 2.32                   |
| PABsnRNA23 (sR1)  | 1209257 (sRNA)   | 1209332        | 1209270      | 1209329    | 59          | 21                          | 4                           | 54                          | 36.27                  |
| PABsnRNA34 (sR59) | 1260087 (utr5)   | 1260197        | 1260126      | 1260195    | 69          | 16                          | 1                           | 4                           | 3.21                   |
| sR41              | 1292340 (ea)     | 1293389        | 1292356      | 1292415    | 59          | 8                           | 0                           | 4                           | 5.63                   |
| PABsnRNA5 (sR11)  | 1397141 (asRNA)  | 1397236        | 1397126      | 1397188    | 62          | 15                          | 1                           | 22                          | 28.62                  |
| PABsnRNA29 (sR8)  | 1403609 (sRNA)   | 1403742        | 1403662      | 1403723    | 61          | 3                           | 0                           | 20                          | 113.04                 |
| PABsnRNA42 (sR36) | 1408146 (ea)     | 1410562        | 1409130      | 1409196    | 66          | 20                          | 2                           | 10                          | 9.73                   |
| PABsnRNA41 (sR48) | 1468599 (ea)     | 1468802        | 1468649      | 1468712    | 63          | 26                          | 9                           | 32                          | 1.23                   |
| PABsnRNA6 (sR6)   | 1536318 (asRNA)  | 1536409        | 1536388      | 1536449    | 61          | 2                           | 0                           | 2                           | 4.33                   |
| PABsnRNA45 (sR34) | 1754729 (ea)     | 1756032        | 1755871      | 1755930    | 59          | 57                          | 11                          | 112                         | 3.02                   |
| PABsnRNA9 (sR12)  | 1754729 (ea)     | 1756032        | 1755929      | 1755991    | 62          | 13                          | 5                           | 15                          | 6.88                   |
| NA1               | 148345 (sRNA)    | 149623         | 148473       | 148526     | 53          | 5                           | 0                           | 5                           | 1.59                   |
| NA2               | 148881 (sRNA)    | 148989         | 148896       | 148942     | 46          | 4                           | 0                           | 0                           | 0                      |
| NA3               | 322364 (ea)      | 337732         | 323520       | 323600     | 80          | 64                          | 4                           | 25                          | 0.56                   |
| NA4               | 382389 (utr5)    | 382622         | 382369       | 382470     | 101         | 9                           | 0                           | 1                           | 4.9                    |
| NA5               | 390351 (ea)      | 390773         | 390758       | 390838     | 80          | 1                           | 3                           | 0                           | 0                      |
| NA6               | 527697 (utr5)    | 527814         | 527722       | 527821     | 99          | 39                          | 0                           | 0                           | 0.0                    |
| NA7               | 621251 (ea)      | 625587         | 622461       | 622526     | 65          | 26                          | 4                           | 19                          | 8.39                   |
| NA8               | 636804 (utr5)    | 636919         | 636809       | 636911     | 102         | 6                           | 0                           | 0                           | 0.0                    |
| NA9               | 800585 (ea)      | 800728         | 800719       | 800740     | 21          | 0                           | 0                           | 10                          | 0                      |
| NA10              | 809965 (sRNA)    | 810133         | 809952       | 809991     | 39          | 4                           | 0                           | 1                           | 0.67                   |
| NA11              | 985053 (ea)      | 986000         | 985853       | 985926     | 73          | 36                          | 0                           | 0                           | 0.0                    |
| NA12              | 1011089 (sRNA)   | 1011286        | 1011096      | 1011158    | 62          | 101                         | 19                          | 104                         | 1.91                   |
| NA13              | 1673288 (ea)     | 1676136        | 1674520      | 1674581    | 61          | 11                          | 1                           | 12                          | 5.36                   |
| PAB0006           |                  |                | 6715         | 6753       | 38          | 4                           | 0                           | 7                           | 1.93                   |
| PAB2343           |                  |                | 11517        | 11605      | 88          | 8                           | 0                           | 9                           | 1.08                   |
| PAB2342           |                  |                | 12252        | 12268      | 16          | 5                           | 0                           | 1                           | 0.17                   |
| PAB2317           |                  |                | 44171        | 44185      | 14          | 2                           | 0                           | 10                          | 3.56                   |
| PAB2317           |                  |                | 44171        | 44247      | 76          | 8                           | 0                           | 10                          | 0.92                   |
| PAB2314           |                  |                | 46025        | 46072      | 47          | 5                           | 1                           | 0                           | 0.0                    |
| PAB2292           |                  |                | 68829        | 68888      | 59          | 1                           | 1                           | 11                          | 7.15                   |

|            |         |         |     |    |    |    |       |
|------------|---------|---------|-----|----|----|----|-------|
| PAB2289    | 72813   | 72826   | 13  | 2  | 0  | 2  | 2.6   |
| PAB0045    | 74601   | 74650   | 49  | 26 | 3  | 2  | 1.15  |
| PAB0054    | 83184   | 83202   | 18  | 14 | 0  | 6  | 1.09  |
| PAB2404    | 117172  | 117201  | 29  | 1  | 0  | 4  | 1.14  |
| PAB0094    | 146311  | 146343  | 32  | 1  | 0  | 3  | 2.0   |
| PAB0122    | 183910  | 183925  | 15  | 2  | 2  | 2  | 5.5   |
| PAB2233    | 190794  | 190914  | 120 | 5  | 0  | 0  | 0.0   |
| PAB2439    | 194612  | 194828  | 216 | 11 | 0  | 0  | 0.0   |
| PAB0164    | 248972  | 249019  | 47  | 1  | 0  | 3  | 3.0   |
| PAB2174    | 272153  | 272236  | 83  | 27 | 0  | 0  | 0.0   |
| PAB0191    | 289005  | 289063  | 58  | 15 | 2  | 13 | 1.44  |
| PAB2145    | 314827  | 314855  | 28  | 2  | 0  | 2  | 1.09  |
| PAB0214    | 322275  | 322332  | 57  | 1  | 3  | 0  | 0.0   |
| PAB2140    | 323514  | 323531  | 17  | 45 | 1  | 33 | 0.93  |
| PAB2122    | 334649  | 334709  | 60  | 2  | 1  | 1  | 2.0   |
| PAB2119    | 337164  | 337238  | 74  | 4  | 1  | 1  | 0.9   |
| PAB0248    | 364460  | 364532  | 72  | 3  | 1  | 1  | 0.28  |
| PAB2090    | 377830  | 377879  | 49  | 3  | 0  | 1  | 10.0  |
| PAB2085    | 387252  | 387277  | 25  | 1  | 0  | 5  | 2.69  |
| PAB2062.1n | 412930  | 413003  | 73  | 20 | 0  | 10 | 1.89  |
| PAB0337    | 477943  | 477970  | 27  | 2  | 2  | 0  | 0     |
| PAB2015    | 496671  | 496721  | 50  | 2  | 0  | 5  | 1.67  |
| PAB0360    | 504191  | 504212  | 21  | 1  | 9  | 0  | 0     |
| PAB0370    | 511064  | 511097  | 33  | 3  | 0  | 2  | 1.6   |
| PAB0423    | 579830  | 579908  | 78  | 1  | 0  | 2  | 2.69  |
| PAB0431    | 592787  | 592814  | 27  | 4  | 0  | 0  | 0     |
| PAB8160    | 605849  | 605926  | 77  | 14 | 1  | 0  | 0.0   |
| PAB1931    | 617378  | 617402  | 24  | 1  | 0  | 4  | 3.43  |
| PAB0463.3n | 635367  | 635401  | 34  | 17 | 0  | 5  | 1.0   |
| PAB0501    | 685766  | 685816  | 50  | 5  | 0  | 0  | 0.0   |
| PAB0504    | 691642  | 691720  | 78  | 5  | 0  | 3  | 1.0   |
| PAB1784    | 827427  | 827464  | 37  | 2  | 2  | 7  | 12.13 |
| PAB0588    | 839035  | 839128  | 93  | 3  | 1  | 3  | 1.0   |
| PAB0591    | 845733  | 845753  | 20  | 1  | 0  | 12 | 0.92  |
| PAB0600    | 863430  | 863461  | 31  | 2  | 2  | 5  | 3.11  |
| PAB0616    | 885219  | 885236  | 17  | 7  | 0  | 4  | 2.0   |
| PAB0645    | 922812  | 922880  | 68  | 1  | 1  | 3  | 15.0  |
| PAB1703    | 962346  | 962364  | 18  | 3  | 0  | 1  | 17.67 |
| PAB1702    | 963981  | 964007  | 26  | 1  | 11 | 0  | 0.0   |
| PAB1679    | 993339  | 993388  | 49  | 5  | 0  | 0  | 0.0   |
| PAB0718    | 1033628 | 1033672 | 44  | 3  | 0  | 3  | 1.67  |
| PAB0726    | 1052759 | 1052783 | 24  | 3  | 0  | 1  | 2.67  |
| PAB0742    | 1069793 | 1069807 | 14  | 1  | 0  | 3  | 2.61  |
| PAB0755    | 1087577 | 1087597 | 20  | 0  | 1  | 2  | 0     |
| PAB1582    | 1156307 | 1156393 | 86  | 22 | 3  | 1  | 1.41  |
| PAB1582    | 1156309 | 1156339 | 30  | 15 | 0  | 0  | 0     |
| PAB1559    | 1198296 | 1198369 | 73  | 0  | 1  | 7  | 0     |
| PAB1527    | 1244069 | 1244158 | 89  | 9  | 1  | 1  | 0.89  |
| PAB1523    | 1250892 | 1250909 | 17  | 42 | 1  | 37 | 0.86  |
| PAB0855    | 1255911 | 1255945 | 34  | 0  | 1  | 5  | 0     |
| PAB1388    | 1448476 | 1448522 | 46  | 0  | 1  | 0  | 0     |
| PAB1349    | 1492102 | 1492122 | 20  | 2  | 0  | 3  | 2.5   |
| PAB1347    | 1494192 | 1494238 | 46  | 9  | 0  | 2  | 0.67  |
| PAB1039    | 1535215 | 1535233 | 18  | 0  | 3  | 1  | 0     |
| PAB1300    | 1558672 | 1558737 | 65  | 5  | 1  | 0  | 0     |
| PAB1287    | 1587346 | 1587384 | 38  | 0  | 1  | 1  | 0     |
| PAB1279    | 1595659 | 1595676 | 17  | 1  | 0  | 3  | 4.0   |
| PAB1271    | 1605940 | 1605958 | 18  | 1  | 0  | 3  | 2.0   |
| PAB1252    | 1639255 | 1639295 | 40  | 4  | 0  | 0  | 0.0   |
| PAB1184    | 1742565 | 1742641 | 76  | 21 | 2  | 0  | 0     |

|               |                           |         |         |     |      |      |      |      |
|---------------|---------------------------|---------|---------|-----|------|------|------|------|
| PAB1176       |                           | 1750178 | 1750282 | 104 | 46   | 7    | 28   | 0.58 |
| PAB1176       |                           | 1750272 | 1750370 | 98  | 7    | 3    | 11   | 1.28 |
| PAB1169       |                           | 1762775 | 1762804 | 29  | 17   | 0    | 17   | 1.06 |
| PAB1168       |                           | 1763107 | 1763228 | 121 | 4    | 0    | 0    | 0.0  |
| PABt05        | 1330325 (ea)      1330647 | 296681  | 296726  | 45  | 8    | 0    | 0    | 0.0  |
| PABt10        |                           | 506292  | 506318  | 26  | 4    | 0    | 0    | 0.0  |
| PABt35 (sR40) |                           | 1330513 | 1330584 | 71  | 4768 | 1228 | 3217 | 0.89 |
| PABt39        |                           | 1413266 | 1413301 | 35  | 14   | 0    | 0    | 0.0  |
| PABt44        |                           | 1640409 | 1640523 | 114 | 90   | 4    | 3    | 0.25 |
| PABr02        |                           | 205111  | 205175  | 64  | 210  | 17   | 107  | 1.35 |
| PABr02        |                           | 205694  | 205720  | 26  | 4    | 0    | 39   | 3.86 |
| PABr02        |                           | 206223  | 206294  | 71  | 1265 | 46   | 35   | 0.9  |
| PABr02        |                           | 206447  | 206491  | 44  | 277  | 12   | 72   | 1.6  |
| PABr03        |                           | 207851  | 207900  | 49  | 12   | 3    | 63   | 3.93 |
| PABr03        |                           | 209203  | 209289  | 86  | 82   | 29   | 47   | 0.86 |

[1] Number of circular reads supporting the circularization junction in the pulldown ligase samples.

[2] Number of circular reads supporting the circularization junction in the pulldown ligase + RNase R treatment sample.

[3] Number of circular reads supporting the circularization junction in the total RNA + RNase R treatment sample.

[4] Enrichment in reads supporting the circularization junction from the pulldown ligase samples to the total RNA + RNase R treatment sample. Given by the ratio  $\frac{P_C}{P_A}$  with  $P_A = \frac{\text{number of circular reads supporting the junction}}{\text{number of reads aligned in the junction}}$  for the pulldown ligase samples and  $P_C$  is given by the same formula for the total RNA + RNase R treatment sample. When the ratio is not defined we wrote 0.
